# Supplementary material for: “It's coming whether we want it to or not”: A qualitative exploration of older adults’ comfort with and perceptions of technology and digital health
Source: Research Square preprint supplement (doi:10.21203/rs.3.rs-8001649/v1), 2025-11-19
Supplement: Supplementary file 1 [file 42ab0b636743045491be0af3.docx]

# Digital Health Interview Guide

*Experience with Technology – general*

I’d like to learn more about your experience with technology overall.

1. Tell me a little bit about your use of technology in your day-to-day life. This could mean using a smartphone, using the computer, etc.
   1. What types of digital spaces do you visit? As in, what websites do you frequent?
   2. What are some challenges you encounter?
   3. Do you normally use technology on your own, meaning without anyone helping you?
      1. IF NO: Do you have someone who helps you with using technology? What do they help you with?
2. How would you describe your relationship with technology? By relationship I mean your comfort level using it, how much you enjoy using technology, etc.
   1. How, if at all, has this evolved in the last few years?Do you feel trustful of technology?
      1. If participant asks for clarification: Do you feel trustful of things like data privacy or data sharing?

*Experience with Technology - Digital Health and the Patient Portal*

Now I’d like to learn a bit more about your overall experiences with digital health. Digital health is a way that technology can help people take care of their health. Some examples of digital health in health care are MyChart to communicate with your doctor or see test results, videos that share information about your health, , health trackers (like an Apple Watch or Fitbit), and health applications (like Health or MyFitnessPal) on a smartphone.

1. What do you know, if anything, about digital health?
2. In your words, what do you think of as examples of digital health?
3. Have you ever used digital health in your healthcare?
   1. If YES: How comfortable do you feel using digital health in your care?
   2. If YES: Can you give examples of what you use digital health for in your care?
4. How do you usually research information about your health? (e.g. talk to your doctor, go online, ask friends?)
5. Do you use the patient portal to access information about your care?
   1. If YES: Can you describe how and when the patient portal was introduced to you?
      1. How comfortable do you feel using the patient portal?
      2. What are the pros of using the patient portal? What are the cons?
   2. If NO: How do you access information about your care?

*Lung Health and the Patient Voices Video*

We reached out to you because you may have gotten a scan for lung health in the past. We are exploring different ways to communicate with patients about lung health scans using digital health. One way that we are trying to communicate with patients is with a video that we send in a message from their primary care provider through the patient portal. We call this video the Patient Voices Video – it’s a 3 minute video about lung cancer screening that we created and are testing with KPWA members to support repeat screening.

I’m going to share my screen now to show you this video, and we can talk about your reactions to it after.

[Check that patient can hear the video before continuing] Can you hear the video?

1. Now that you’ve watched the video, what’s your reaction?
2. What did you like or not like about the experience, from accessing the video to the content of the video, or anything else about it?
   1. What appealed to you about the content? Did you see someone like yourself in this video?
   2. What did you not like or did not apply to you?
   3. What did you get out of the video? In other words, what did you understand to be message of this video?
   4. What did you learn that was new or unexpected?
   5. Is there any other information that you think is missing (e.g., what other messages should be conveyed)?
   6. Can you describe how you felt during and after watching the video (e.g., anxious, reassured)?
   7. Is this video a type of communication you’d like to receive from your PCP? Why or why not?
   8. Would you want to talk to your PCP about watching this video and initiate a conversation with them about lung cancer screening? Why or why not?
   9. When do you think is the best time to view a video like this? Right after a screening? Or before your visit? During your visit?
3. What suggestions do you have to improve the experience of receiving and watching the Patient Voices video? This could be anything from opening the video, to images and spoken words, to length of the video.
4. Like I mentioned earlier, this video is sent using the patient portal. How confident do you feel about using the patient portal to access a video like this?
   1. Why?

*Closing Questions*

1. How prepared do you feel to use digital health (like using the patient portal to watch this video) as part of your healthcare journey?
   1. What concerns do you have?
   2. *[If they don’t currently use digital health]* How do you feel about integrating digital health as part of your health care?
2. Is there anything else you want to share with me about:
   1. Technology (overall)
   2. Digital health (overall)
   3. Patient Voices Video (overall)
